# Supplementary material for: Effects of Elaidic Acid on HDL Cholesterol Uptake Capacity
Source: MDPI journal article supplement (doi:10.3390/nu13093112), 2021-09-04
Supplement: s1 [file s1]

(A)

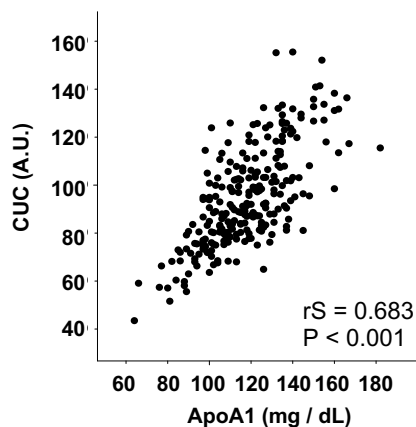

(B)

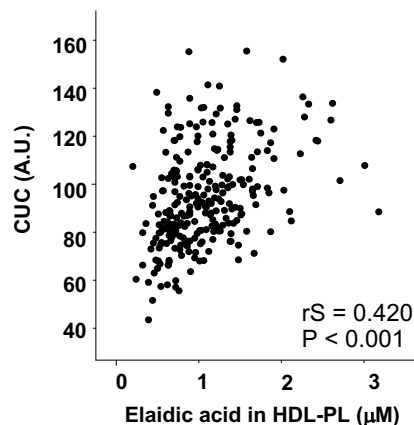

(C)

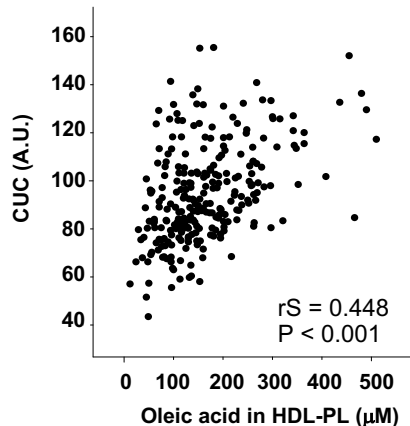

(D)

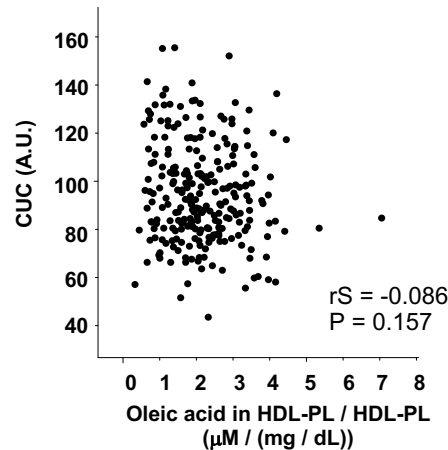

**Figure S1.** (A) Correlations between CUC and apoA1 ( $rS = 0.683$ ,  $P < 0.001$ ). (B) Correlations between CUC and Elaidic acid in HDL-PL ( $rS = 0.420$ ,  $P < 0.001$ ). (C) Correlations between CUC and Oleic acid in HDL-PL ( $rS = 0.448$ ,  $P < 0.001$ ). (D) Correlations between CUC and oleic acid in HDL-PL/ HDL-PL ratio ( $rS = -0.086$ , NS). CUC, cholesterol uptake capacity; A.U., arbitrary units; ApoA1, apolipoprotein A1; HDL-PL, high-density lipoprotein phospholipid.
