# Supplementary material for: Effects of Elaidic Acid on HDL Cholesterol Uptake Capacity
Source: MDPI journal article supplement (doi:10.3390/nu13093112), 2021-09-04
Supplement: s1 [file s1]

**Table S1. Detailed laboratory data**

|                                    | <b>Rev.(+)</b><br>(n=80) | <b>Rev.(–)</b><br>(n=184) | <b>p Values</b> |
|------------------------------------|--------------------------|---------------------------|-----------------|
| <b>HbA1c (%)</b>                   | 6.53 ± 1.2               | 6.3 ± 0.9                 | 0.22            |
| <b>TG (mg/dL)</b>                  | 133.9 ± 70.8             | 126.5 ± 71.3              | 0.12            |
| <b>TC (mg/dL)</b>                  | 146.1 ± 29.9             | 147.1 ± 31.7              | 0.74            |
| <b>LDL-C (mg/dL)</b>               | 83.9 ± 26.6              | 81.2 ± 26.1               | 0.67            |
| <b>HDL-C (mg/dL)</b>               | 43.2 ± 10.1              | 47.4 ± 13.4               | 0.061           |
| <b>CUC (A.U.)</b>                  | 90.0 ± 17.8              | 96.9 ± 21.2               | 0.026           |
| <b>HDL-PL (mg/dL)</b>              | 71.2 ± 23.1              | 80.9 ± 27.5               | 0.015           |
| <b>HDL-TG (mg/dL)</b>              | 13.1 ± 5.9               | 13.8 ± 6.5                | 0.37            |
| <b>Elaidic acid in HDL-PL (μM)</b> | 0.98 ± 0.43              | 1.1 ± 0.52                | 0.065           |

Values are presented as mean ± SD. Rev.(+), patients with revascularization; Rev.(–), patients without revascularization; HbA1c, hemoglobin A1c; TG, triglyceride; TC, total cholesterol; LDL-C, low-density lipoprotein cholesterol; HDL-C, high-density lipoprotein cholesterol; CUC, cholesterol uptake capacity; HDL-PL, high-density lipoprotein phospholipid; HDL-TG, high-density lipoprotein triglyceride; A.U., arbitrary units. Data were analyzed using the unpaired Mann-Whitney test.

**Table S2. Detailed baseline patient characteristics**

|                     | <b>Rev.(+)</b><br>(n=80) | <b>Rev.(–)</b><br>(n=184) | <b>p Values</b> |
|---------------------|--------------------------|---------------------------|-----------------|
| Age                 | 71.0 ± 9.9               | 72.1 ± 8.9                | 0.39            |
| Male, n (%)         | 67 (83.8)                | 143 (77.7)                | 0.26            |
| Hypertension, n (%) | 57 (71.3)                | 147 (79.9)                | 0.12            |

|                        |           |            |       |
|------------------------|-----------|------------|-------|
| Dyslipidemia, n (%)    | 64 (80.0) | 157 (71.0) | 0.28  |
| Diabetes, n (%)        | 46 (57.5) | 73 (39.7)  | 0.007 |
| Smoking history, n (%) | 56 (70.9) | 124 (67.4) | 0.58  |

---

Values are presented as mean  $\pm$  SD and absolute numbers (%). Rev.(+), patients with revascularization; Rev.(–), patients without revascularization. Data were analyzed using the chi-square test for categorical values and the unpaired Mann-Whitney test for continuous variables.
